# Supplementary material
Source: PubMed Central journal article supplement (PMC8556659)
Supplement: mmc1.pdf [file mmc1.pdf]

# Data Content Analysis\_Program

1. **Count**  
~83000 tweets

2. **Sentiment Analysis**

**Sentiment**

**Positive Sentiment 42.92596717183944 %**

**Negative Sentiment 7.931051179005471 %**

**Neutral Sentiment 49.14298164915509 %**

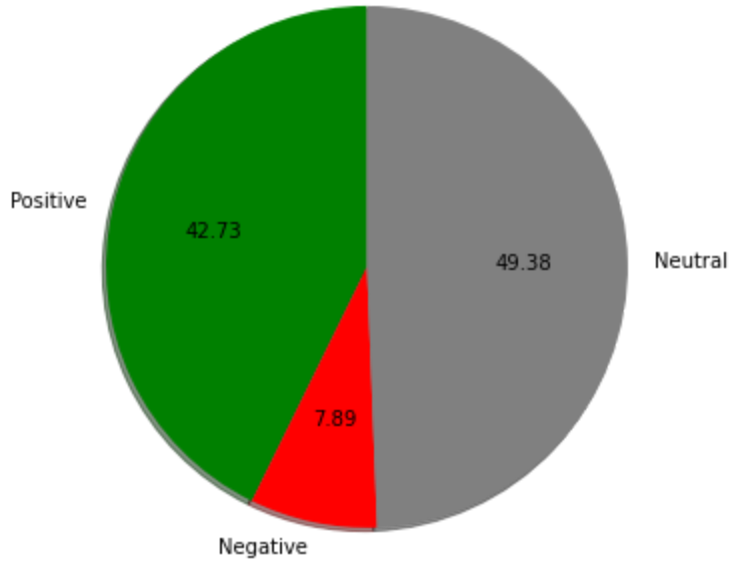

### 3. Word Cloud Analysis

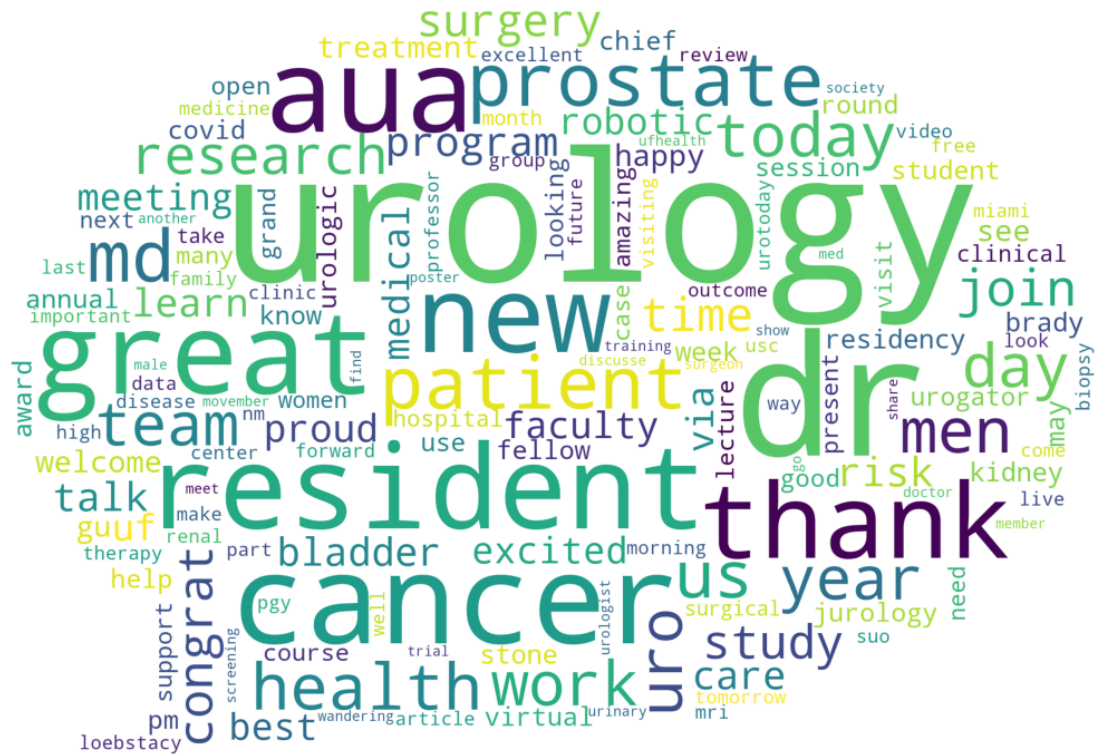

#### 4. Hashtag Analysis

| Hashtags        | Occurrences |
|-----------------|-------------|
| #prostatecancer | 2951        |
| #urology        | 1789        |
| #urogators      | 901         |
| #bladdercancer  | 892         |
| #aua19          | 660         |
| #aua16          | 499         |
| #aua17          | 495         |
| #aua18          | 491         |
| #prostate       | 432         |
| #kidneycancer   | 429         |

Top 10 Hashtags in Tweets by Programs

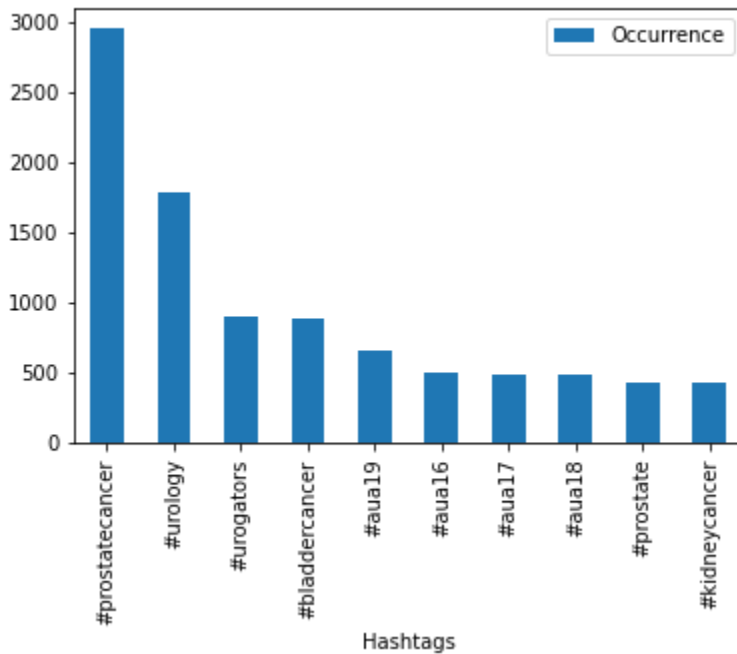

#### 5. Mention Analysis

| Mentions         | Occurrences |
|------------------|-------------|
| @amerurological  | 2349        |
| @umichurology    | 1769        |
| @amerurological: | 1078        |
| @brady_urology   | 930         |
| @jurology:       | 857         |
| @nyuurology      | 669         |
| @mayourology     | 625         |
| @urotoday:       | 572         |
| @columbiaurology | 570         |
| @urologycarefdn: | 526         |

Top 10 Mentions in Tweets by Programs

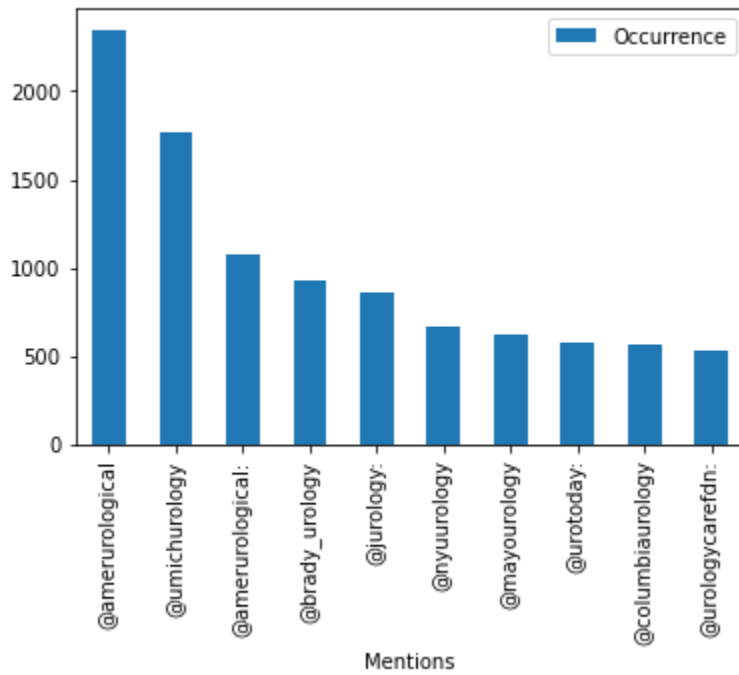

## 6. Most Prominent Words

| Words    | Occurrences |
|----------|-------------|
| urology  | 14391       |
| dr       | 11735       |
| cancer   | 5862        |
| aua      | 5302        |
| great    | 5051        |
| prostate | 4064        |
| md       | 3862        |
| new      | 3602        |
| us       | 3163        |
| health   | 2963        |

Top 10 Frequent Words in Tweets by Programs

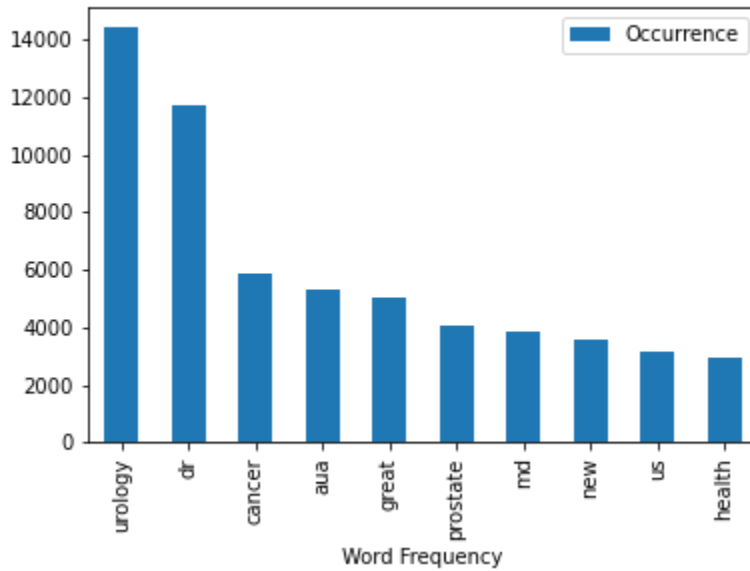

## 7. Languages

English was the most used language (over ~97% tweets)

Spanish, Romanian and French were the other most used languages

## 8. Bigram Analysis

### Most occurring 2 word pairs

| Bigrams            | Occurrences |
|--------------------|-------------|
| (prostate, cancer) | 2531        |
| (brady, urology)   | 1096        |
| (join, us)         | 1027        |
| (grand, rounds)    | 892         |
| (bladder, cancer)  | 765         |
| (men, health)      | 722         |
| (wandering, gu)    | 689         |
| (nm, urology)      | 651         |
| (looking, forward) | 644         |
| (uf, urology)      | 633         |

Top 10 Bigrams in Tweets by Programs

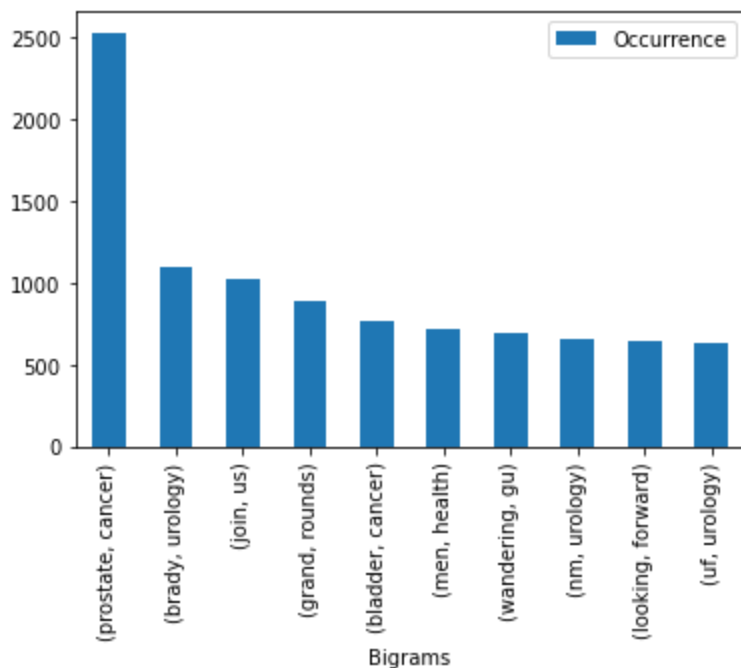

### 9. Trigram Analysis

Most occurring 3 word pairs

| Trigrams                      | Occurrences |
|-------------------------------|-------------|
| (virtual, open, house)        | 219         |
| (urology, grand, rounds)      | 182         |
| (cancer, awareness, month)    | 125         |
| (risk, prostate, cancer)      | 123         |
| (prostate, cancer, screening) | 100         |
| (urology, residency, program) | 94          |
| (renal, cell, carcinoma)      | 92          |
| (small, renal, masses)        | 91          |
| (non, muscle, invasive)       | 90          |
| (edward, schaeffer, md)       | 89          |

## Top 10 Trigrams in Tweets by Programs

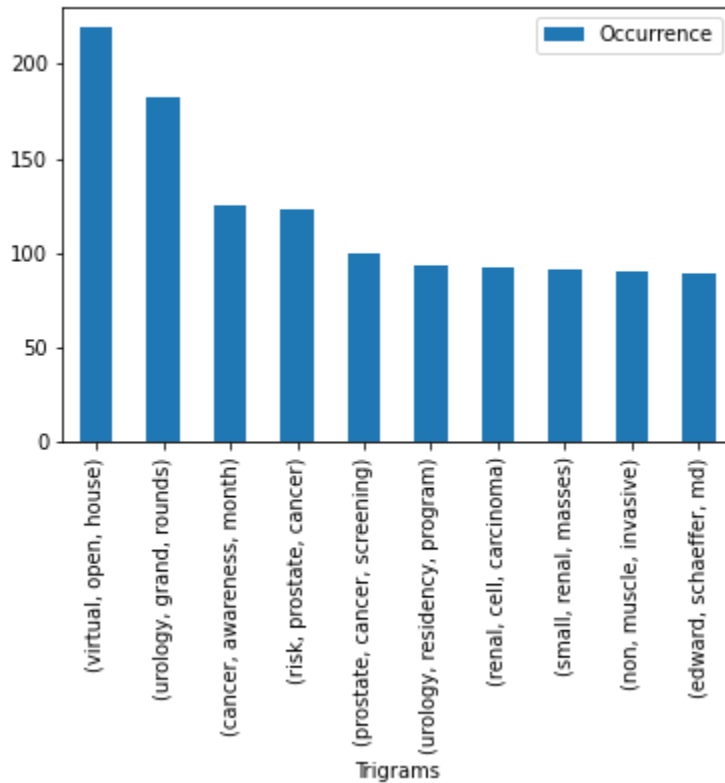

## 10. Topic Modeling

Topics for Given Tweets

Major topics around which conversation took place

(0, '0.000\*\*dr" + 0.000\*\*urology" + 0.000\*\*cancer" + 0.000\*\*today"')

(1, '0.000\*\*dr" + 0.000\*\*urology" + 0.000\*\*cancer" + 0.000\*\*prostate"')

(2, '0.000\*\*dr" + 0.000\*\*urology" + 0.000\*\*cancer" + 0.000\*\*day"')

(3, '0.024\*\*dr" + 0.023\*\*urology" + 0.017\*\*cancer" + 0.009\*\*prostate"')

(4, '0.000\*\*dr" + 0.000\*\*urology" + 0.000\*\*cancer" + 0.000\*\*health"')

## 11. Data Summarization- Basic Statistics



|                    | count | mean        | std         | min  | 25%   | 50%    | 75%    | max    |
|--------------------|-------|-------------|-------------|------|-------|--------|--------|--------|
| <b>Tweet_Count</b> | 113.0 | 797.371681  | 1251.777616 | 7.0  | 110.0 | 359.0  | 890.0  | 8707.0 |
| <b>Followers</b>   | 113.0 | 1326.256637 | 1080.835406 | 91.0 | 620.0 | 1009.0 | 1640.0 | 5365.0 |
| <b>Friends</b>     | 113.0 | 579.070796  | 681.551784  | 11.0 | 192.0 | 359.0  | 731.0  | 4124.0 |

|                      | count   | mean        | std         | min  | 25%    | 50%    | 75%    | max      |
|----------------------|---------|-------------|-------------|------|--------|--------|--------|----------|
| <b>Likes</b>         | 82998.0 | 3.063423    | 8.814542    | 0.0  | 0.0    | 0.0    | 3.0    | 368.0    |
| <b>Retweet Count</b> | 82998.0 | 32.374503   | 1328.824713 | 0.0  | 1.0    | 2.0    | 4.0    | 163808.0 |
| <b>Tweet_Count</b>   | 82998.0 | 2195.531109 | 1875.079125 | 7.0  | 872.0  | 1748.0 | 3051.0 | 8713.0   |
| <b>Followers</b>     | 82998.0 | 2553.728945 | 1361.611082 | 91.0 | 1509.0 | 2201.0 | 3956.0 | 5365.0   |
| <b>Friends</b>       | 82998.0 | 968.386660  | 818.915398  | 11.0 | 307.0  | 801.0  | 1198.0 | 4124.0   |

## 12. Correlation Matrix

|                      | Likes     | Retweet Count | Tweet_Count | Followers | Friends   |
|----------------------|-----------|---------------|-------------|-----------|-----------|
| <b>Likes</b>         | 1.000000  | -0.007326     | -0.071083   | -0.048052 | 0.007654  |
| <b>Retweet Count</b> | -0.007326 | 1.000000      | -0.006970   | -0.013815 | -0.003335 |
| <b>Tweet_Count</b>   | -0.071083 | -0.006970     | 1.000000    | 0.604075  | 0.145876  |
| <b>Followers</b>     | -0.048052 | -0.013815     | 0.604075    | 1.000000  | 0.225597  |
| <b>Friends</b>       | 0.007654  | -0.003335     | 0.145876    | 0.225597  | 1.000000  |

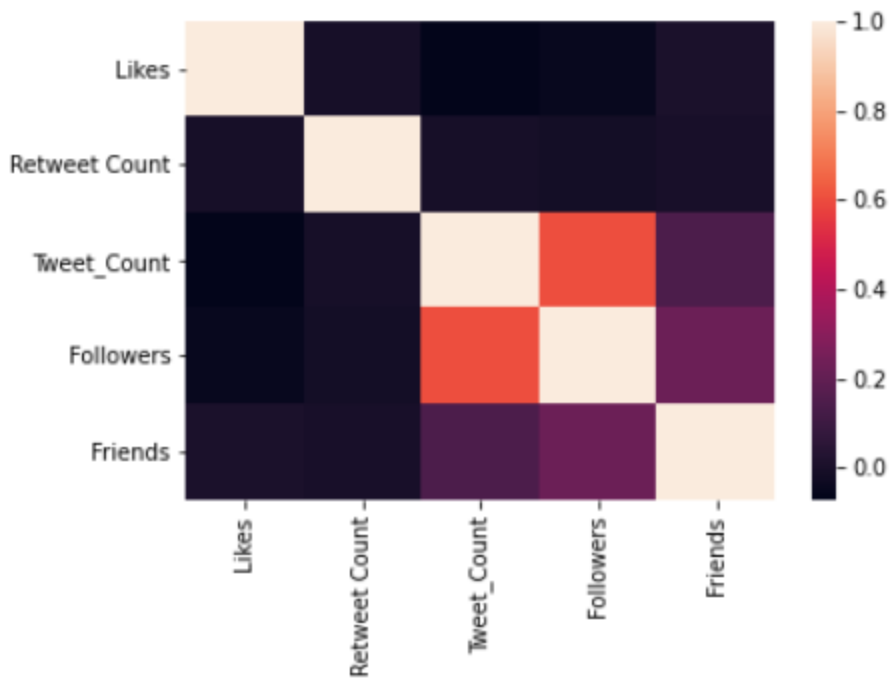

### 13. Average Follower Count

| Program                          | Avg. Followers |
|----------------------------------|----------------|
| Johns Hopkins                    | 5,365.00       |
| NYU                              | 4,882.00       |
| University of Michigan           | 4,396.00       |
| Cook County                      | 4,347.00       |
| Cleveland Clinic                 | 4,129.00       |
| UNC                              | 3,956.00       |
| USC                              | 3,409.00       |
| UCSF                             | 3,264.00       |
| Columbia                         | 3,093.00       |
| University of Miami              | 2,902.00       |
| Mayo-Rochester                   | 2,851.00       |
| Mayo-Scottsdale                  | 2,850.00       |
| Northwestern                     | 2,822.00       |
| University of New Mexico         | 2,822.00       |
| Medical College of Georgia       | 2,614.00       |
| Penn State (Herchey)             | 2,402.00       |
| Massachusetts General Hospital   | 2,334.00       |
| Penn                             | 2,201.00       |
| Brigham and Women's              | 2,087.00       |
| Emory                            | 2,066.00       |
| University of Alabama-Birmingham | 2,020.00       |
| Dartmouth                        | 1,958.00       |
| Tulane                           | 1,879.00       |
| Yale                             | 1,697.00       |
| Ohio State                       | 1,669.00       |
| Lahey Clinic                     | 1,660.00       |
| University of Utah               | 1,656.00       |
| Vanderbilt                       | 1,648.00       |
| UC Irvine                        | 1,640.00       |
| UVA                              | 1,572.00       |

### Average Follower Count - Programs

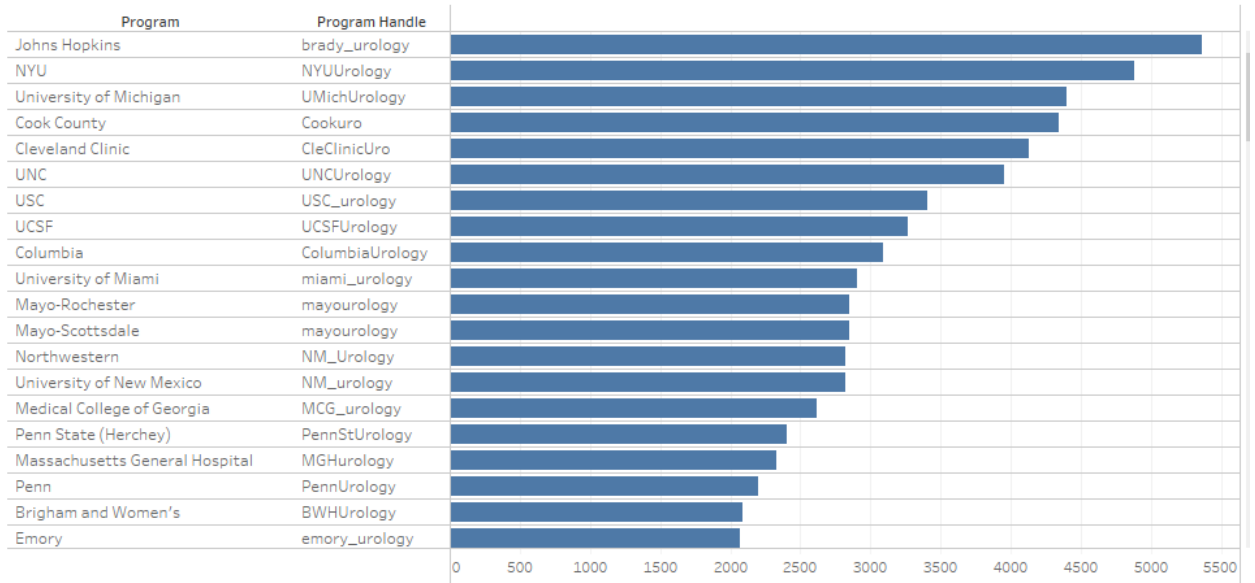

## 14. Average Tweet Count

### Average Tweet Count - Programs

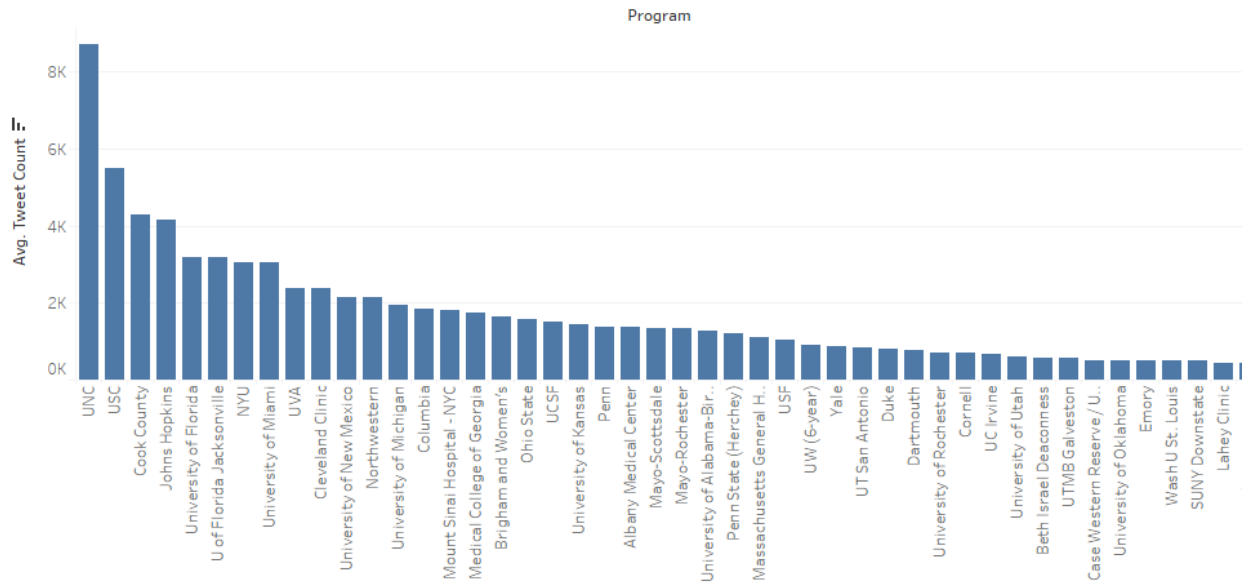

**Average Tweet Count - Programs**

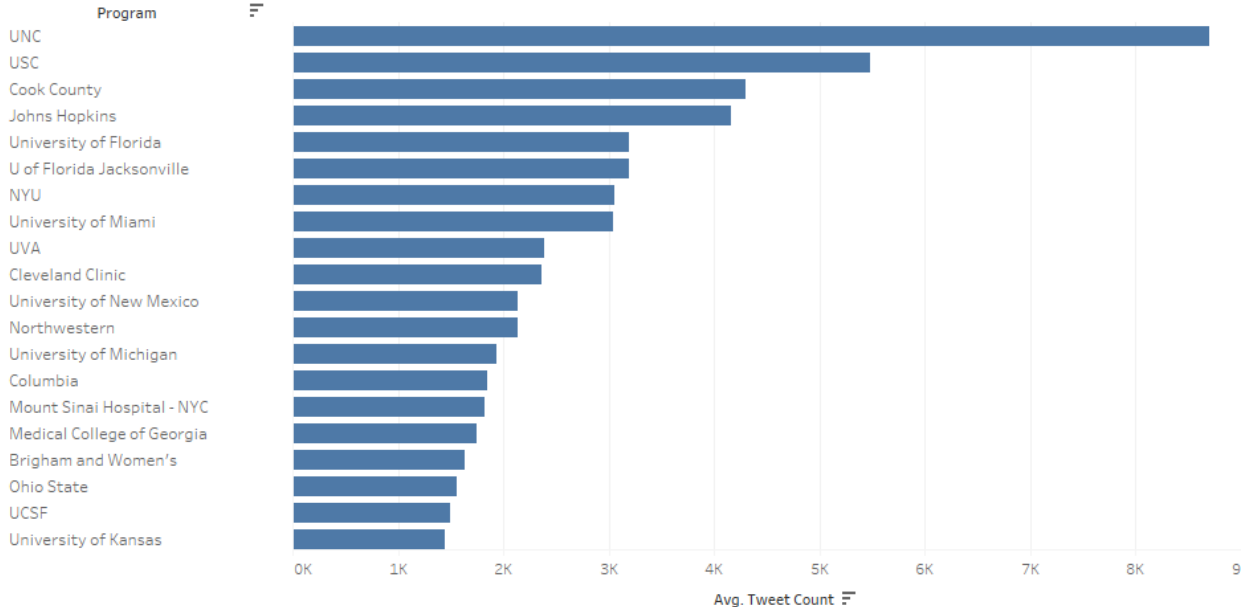

| Program                          | Avg. Tweet Count |
|----------------------------------|------------------|
| UNC                              | 8,707.00         |
| USC                              | 5,480.00         |
| Cook County                      | 4,299.00         |
| Johns Hopkins                    | 4,167.00         |
| University of Florida            | 3,190.00         |
| U of Florida Jacksonville        | 3,190.00         |
| NYU                              | 3,051.00         |
| University of Miami              | 3,047.00         |
| UVA                              | 2,386.00         |
| Cleveland Clinic                 | 2,362.00         |
| University of New Mexico         | 2,139.00         |
| Northwestern                     | 2,139.00         |
| University of Michigan           | 1,937.00         |
| Columbia                         | 1,848.00         |
| Mount Sinai Hospital - NYC       | 1,822.00         |
| Medical College of Georgia       | 1,748.00         |
| Brigham and Women's              | 1,630.00         |
| Ohio State                       | 1,563.00         |
| UCSF                             | 1,502.00         |
| University of Kansas             | 1,441.00         |
| Penn                             | 1,376.00         |
| Albany Medical Center            | 1,364.00         |
| Mayo-Scottsdale                  | 1,352.00         |
| Mayo-Rochester                   | 1,352.00         |
| University of Alabama-Birmingham | 1,269.00         |
| Penn State (Herchey)             | 1,222.00         |
| Massachusetts General Hospital   | 1,111.00         |
| USF                              | 1,037.00         |
| UW (6-year)                      | 890.00           |
| Yale                             | 872.00           |
| UT San Antonio                   | 835.00           |
| Duke                             | 794.00           |
| Dartmouth                        | 783.00           |

## 15. Average Friend Count

### Average Friends Count - Programs

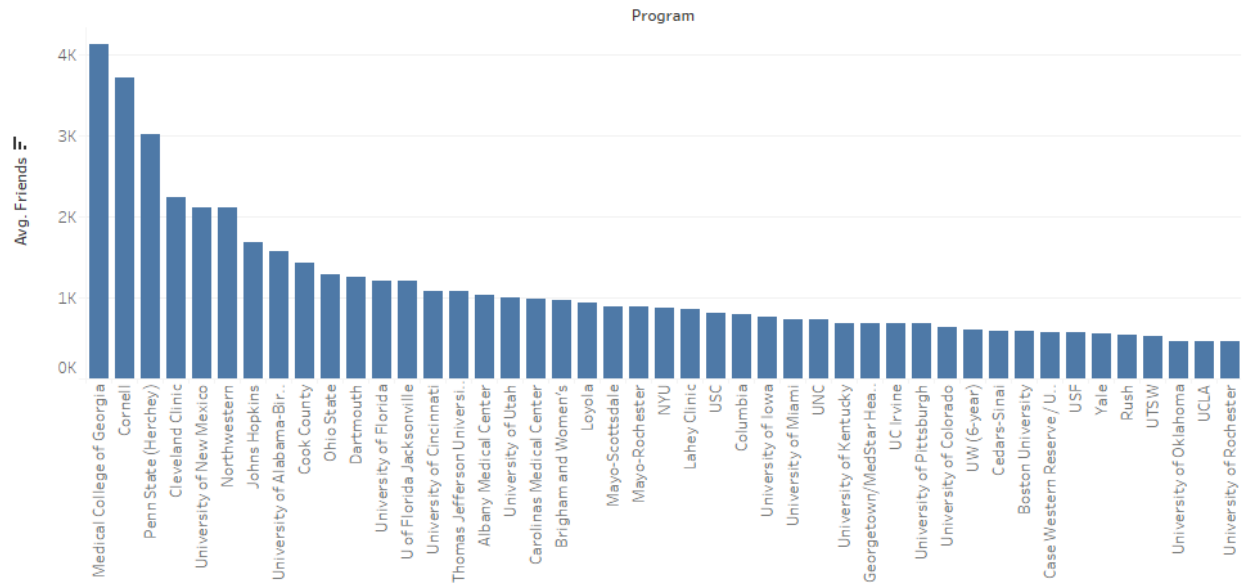

### Average Friends Count - Programs

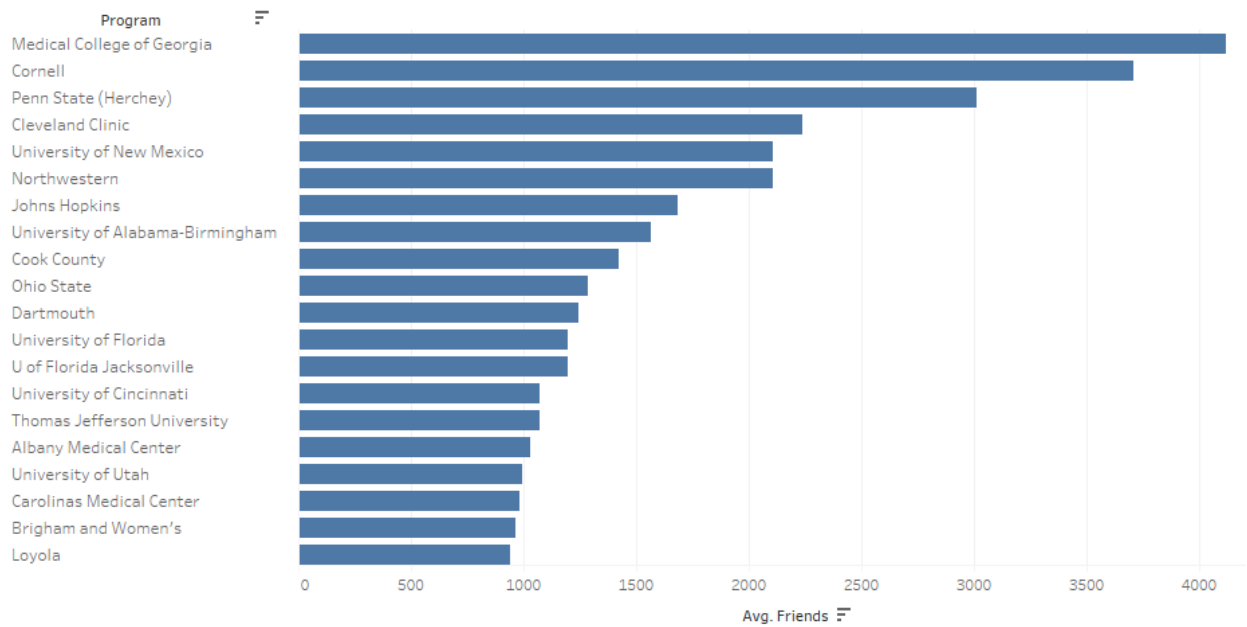

| Program                          | Avg. Friends |
|----------------------------------|--------------|
| Medical College of Georgia       | 4,124.00     |
| Cornell                          | 3,709.00     |
| Penn State (Herchey)             | 3,012.00     |
| Cleveland Clinic                 | 2,239.00     |
| University of New Mexico         | 2,108.00     |
| Northwestern                     | 2,108.00     |
| Johns Hopkins                    | 1,685.00     |
| University of Alabama-Birmingham | 1,565.00     |
| Cook County                      | 1,425.00     |
| Ohio State                       | 1,285.00     |
| Dartmouth                        | 1,247.00     |
| University of Florida            | 1,198.00     |
| U of Florida Jacksonville        | 1,198.00     |
| University of Cincinnati         | 1,074.00     |
| Thomas Jefferson University      | 1,073.00     |
| Albany Medical Center            | 1,033.00     |
| University of Utah               | 993.00       |
| Carolinas Medical Center         | 982.00       |
| Brigham and Women's              | 962.00       |
| Loyola                           | 943.00       |
| Mayo-Scottsdale                  | 887.00       |
| Mayo-Rochester                   | 887.00       |
| NYU                              | 874.00       |
| Lahey Clinic                     | 854.00       |
| USC                              | 807.00       |
| Columbia                         | 801.00       |
| University of Iowa               | 767.00       |
| University of Miami              | 736.00       |
| UNC                              | 731.00       |

## 16 Account Creation

There was a huge spike not only for Candidates but many(23) programs created their twitter accounts in 2020.



## Account Creation Timeline - Programs

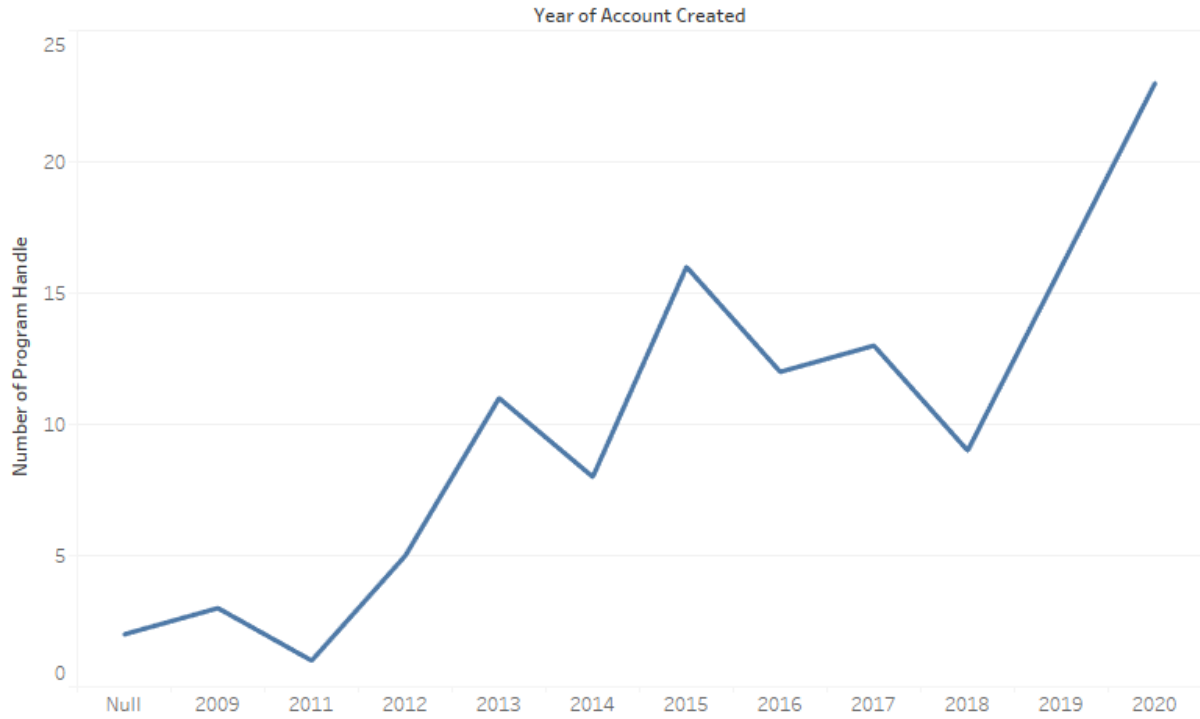

**17 Account Creation in the Year 2020**

| Account Creation - Programs - 2020 |         |          |     |      |      |        |           |
|------------------------------------|---------|----------|-----|------|------|--------|-----------|
| Program / Month                    | January | February | May | June | July | August | September |
| Akron/NEOMED                       |         |          |     |      |      |        |           |
| Baylor                             |         |          |     |      |      |        |           |
| Creighton                          |         |          |     |      |      |        |           |
| Detroit Medical Center             |         |          |     |      |      |        |           |
| George Washington University       |         |          |     |      |      |        |           |
| Kaiser LA                          |         |          |     |      |      |        |           |
| LIJ (Hofstra)                      |         |          |     |      |      |        |           |
| Maine Medical Center               |         |          |     |      |      |        |           |
| NYMC                               |         |          |     |      |      |        |           |
| Oregon Health & Science University |         |          |     |      |      |        |           |
| Rowan                              |         |          |     |      |      |        |           |
| Rutgers NJMS                       |         |          |     |      |      |        |           |
| SUNY Stony Brook                   |         |          |     |      |      |        |           |
| SUNY Upstate                       |         |          |     |      |      |        |           |
| Scott & White                      |         |          |     |      |      |        |           |
| UC Davis                           |         |          |     |      |      |        |           |
| UT Chattanooga                     |         |          |     |      |      |        |           |
| UT Knoxville                       |         |          |     |      |      |        |           |
| Univ of Puerto Rico                |         |          |     |      |      |        |           |
| University of Chicago              |         |          |     |      |      |        |           |
| University of Iowa                 |         |          |     |      |      |        |           |
| University of Toledo               |         |          |     |      |      |        |           |
| William Beaumont                   |         |          |     |      |      |        |           |

Program

- Akron/NEOMED
- Baylor
- Creighton
- Detroit Medical Center
- George Washington University
- Kaiser LA
- LIJ (Hofstra)
- Maine Medical Center
- NYMC
- Oregon Health & Science University
- Rowan
- Rutgers NJMS
- Scott & White
- SUNY Stony Brook
- SUNY Upstate
- UC Davis
- Univ of Puerto Rico
- University of Chicago
- University of Iowa
- University of Toledo
- UT Chattanooga
- UT Knoxville
- William Beaumont

## Account Creation - Programs 2020

Month of A..

---

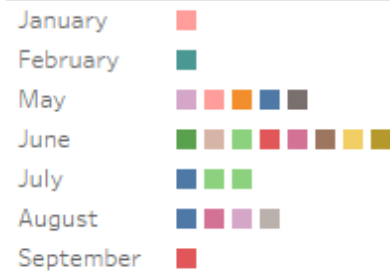

## 18 Tweet Timeline

## Tweet Count Timeline

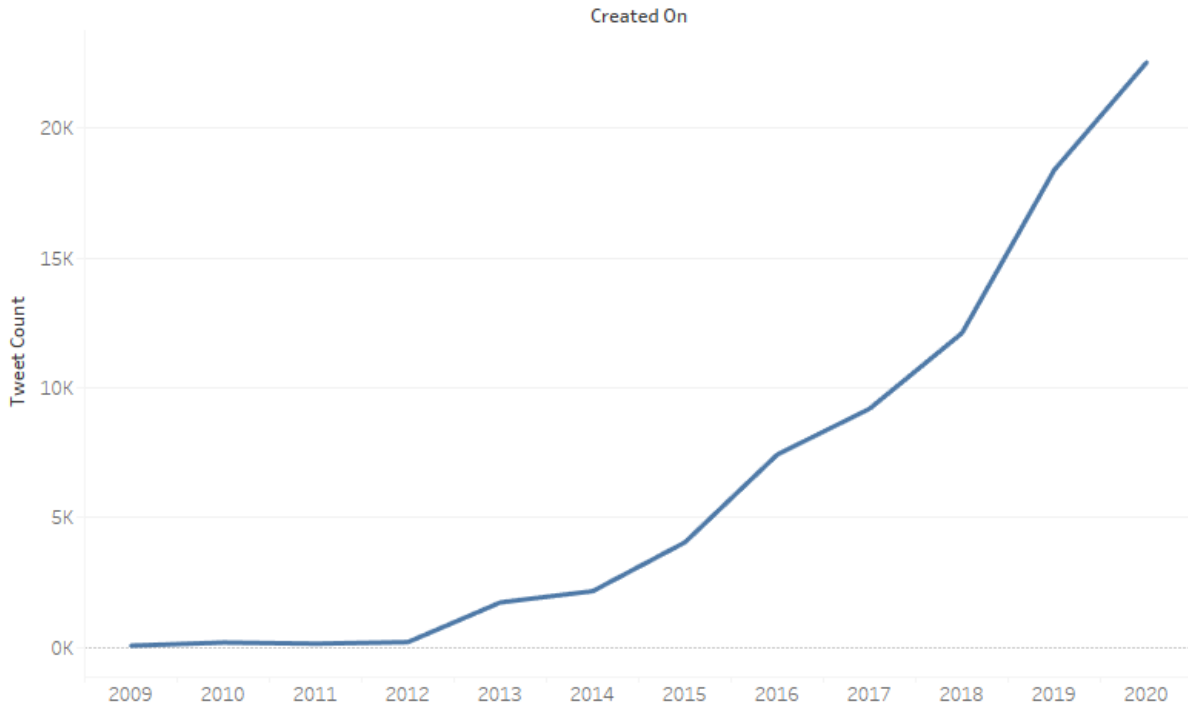

---

### Tweet Timeline - Programs

---

| Tweet Year | Tweet Count |
|------------|-------------|
| 2009       | 62          |
| 2010       | 181         |
| 2011       | 139         |
| 2012       | 197         |
| 2013       | 1,729       |
| 2014       | 2,161       |
| 2015       | 4,046       |
| 2016       | 7,428       |
| 2017       | 9,196       |
| 2018       | 12,108      |
| 2019       | 18,397      |
| 2020       | 22,544      |
| 2021       | 1,167       |

---
